# Supplementary material for: Prevalence of Excessive Weight and Underweight and Its Associated Knowledge and Lifestyle Behaviors among Urban Private School-Going Adolescents in New Delhi
Source: MDPI journal article supplement (doi:10.3390/nu13093296), 2021-09-21
Supplement: s1 [file s1]

## Supplementary Files

**Supplementary Table S1: Description of independent variables**

|                             |                                                                                                                                                                                                                                                                                                                                                                                                                                                                                                                                                                                                                                                                                                      |
|-----------------------------|------------------------------------------------------------------------------------------------------------------------------------------------------------------------------------------------------------------------------------------------------------------------------------------------------------------------------------------------------------------------------------------------------------------------------------------------------------------------------------------------------------------------------------------------------------------------------------------------------------------------------------------------------------------------------------------------------|
| Dietary knowledge           | <p>Q1 How much do you agree that watching TV while eating may lead to overweight/obesity?</p> <p>Q2 How much do you agree that children who are overweight or underweight have more health problems than children with healthy weight?</p> <p>Q3 How much do you agree that skipping meals is a good way to lose weight?</p>                                                                                                                                                                                                                                                                                                                                                                         |
| Physical activity knowledge | <p>Q4 The minimum amount of time recommended for moderate to vigorous physical activity daily (running, cycling, brisk walking, jogging, play sports etc.) for healthy living among children and youth is:</p> <ul style="list-style-type: none"> <li>- Less than 60 minutes</li> <li>- 60 minutes</li> </ul>                                                                                                                                                                                                                                                                                                                                                                                        |
| Dietary Behaviour           | <p>Q5 How often do you read the nutritional labels of packed food items while purchasing them?</p> <p>Q6 Do you eat more than usual when you are studying for exams?</p> <p>Q7 Do you eat more than usual when you are physically active?</p> <p>Q8 How many times do you eat Vegetables (katoris/bowl)/day?</p> <p>Q9 In a typical week, on how many days do you eat breakfast?</p> <p>Q10 In a typical week, how often do you eat fast/ junk food (e.g. Burger, Pizza, noodles, etc.)?</p> <p>Q11 Do you eat more than usual when you are out with friend/s?</p> <p>Q12 Do you eat more than usual when you are out with the family?</p> <p>Q13 Do you eat more than usual when you are angry?</p> |
| Physical activity behaviour | <p>Q14 Over the last 5 school days, what did you do most of the time during lunch break (apart from eating)?</p> <p>Q15 In a typical week, on how many days you are involved in extracurricular activities at school which require being physically active (e.g. dancing, playing games, gymnastics, etc.)?</p> <p>Q16 On a typical day, how many hours do you spend doing vigorous physical activity (e.g: running, fast cycling, fast swimming, or moving heavy loads)</p>                                                                                                                                                                                                                         |

**Supplementary Table S2: Differences in socio-demographic factors between overweight/obese adolescents and normal/underweight adolescents.**

| <b>BMI Categories</b>                                   | <b>Underweight (n=113)<br/>N(%)</b> | <b>Normal (n=959)<br/>N(%)</b> | <b>Excessive weight<br/>(n=492)<br/>N(%)</b> | <b>p-value</b> |
|---------------------------------------------------------|-------------------------------------|--------------------------------|----------------------------------------------|----------------|
| <b>Gender</b>                                           |                                     |                                |                                              | 0.428          |
| Boys (969)                                              | 72(63.7)                            | 582(60.7)                      | 315(64.0)                                    |                |
| Girls (595)                                             | 41(36.3)                            | 377(39.3)                      | 177(35.9)                                    |                |
| <b>Class</b>                                            |                                     |                                |                                              | 0.425          |
| 6 (815)                                                 | 53(46.9)                            | 498(51.9)                      | 264(53.7)                                    |                |
| 7 (749)                                                 | 60(53.1)                            | 461(48.1)                      | 228(46.3)                                    |                |
| <b>Education of father</b>                              |                                     |                                |                                              | <b>0.016*</b>  |
| Advanced professional degree (e. g. PG, PhD etc.) (389) | 21(19.6)                            | 238(26.2)                      | 130(28.6)                                    |                |
| Graduate (552)                                          | 42(39.3)                            | 322(35.3)                      | 188(41.4)                                    |                |
| Up to Senior Secondary (316)                            | 26(24.3)                            | 218(24.0)                      | 72(15.9)                                     |                |
| Up to Middle school (183)                               | 17(15.9)                            | 108(11.9)                      | 58(12.8)                                     |                |
| No formal schooling (28)                                | 1(0.9)                              | 21(2.6)                        | 6(1.3)                                       |                |
| <b>Education of mother</b>                              |                                     |                                |                                              | 0.051          |
| Advanced professional degree (e. g. PG, PhD etc.) (263) | 11(10.1)                            | 163(17.6)                      | 89(19.7)                                     |                |
| Graduate (569)                                          | 33(30.3)                            | 356(38.5)                      | 180(39.6)                                    |                |
| Upto Senior Secondary (362)                             | 37(33.9)                            | 228(24.7)                      | 97(21.3)                                     |                |
| Upto Middle school (231)                                | 23(21.1)                            | 136(14.7)                      | 72(15.8)                                     |                |
| No formal schooling (64)                                | 5(4.6)                              | 42(4.5)                        | 17(3.7)                                      |                |
| <b>Father's occupation</b>                              |                                     |                                |                                              | 0.155          |
| Professional (539)                                      | 28(5.2)                             | 344(63.9)                      | 167(30.9)                                    |                |
| Semi-professional (242)                                 | 16(6.6)                             | 147(60.7)                      | 79(32.7)                                     |                |

|                                    |          |           |           |       |
|------------------------------------|----------|-----------|-----------|-------|
| Clerical, shop owner, farmer (222) | 18(8.1)  | 129(58.1) | 75(33.8)  |       |
| Worker (296)                       | 21(7.1)  | 187(63.2) | 88(29.7)  |       |
| Unemployed (40)                    | 7(17.5)  | 23(57.5)  | 10(25)    |       |
| <b>Mother's occupation</b>         |          |           |           | 0.260 |
| Professional (189)                 | 7(7.2)   | 127(15.5) | 55(13.7)  |       |
| Semi-professional (67)             | 6(6.2)   | 37(4.5)   | 24(5.9)   |       |
| Clerical, shop owner, farmer (45)  | 3(3.1)   | 23(2.8))  | 19(4.7)   |       |
| Worker (87)                        | 5(5.2)   | 54(6.6)   | 28(6.9)   |       |
| Unemployed (931)                   | 76(78.4) | 579(70.6) | 276(68.8) |       |

**Supplementary Table S3: Tukey Post hoc tests for group differences in behavior and knowledge variables**

| Variables                                                                                                                  | Normal versus Underweight | p-value      | Normal versus Excessive weight | p-value      | Underweight versus Excessive weight | p-value      |
|----------------------------------------------------------------------------------------------------------------------------|---------------------------|--------------|--------------------------------|--------------|-------------------------------------|--------------|
|                                                                                                                            | (Mean difference )        |              | (Mean difference )             |              | (Mean difference )                  |              |
| <b>Behaviour: Daily vegetable intake</b>                                                                                   | 0.06                      | 0.79         | 0.003                          | 0.79         | 0.06                                | 0.99         |
| <b>Behaviour: Eat more while studying during exams</b>                                                                     | 0.15                      | <b>0.008</b> | 0.07                           | <b>0.05</b>  | 0.22                                | <b>0.000</b> |
| <b>Behaviour: Read nutritional labels of packaged food while purchasing</b>                                                | 0.09                      | 0.59         | 0.16                           | <b>0.008</b> | 0.26                                | <b>0.03</b>  |
| <b>Knowledge: minimum amount of recommended moderate to vigorous physical activity</b>                                     | 0.34                      | <b>0.003</b> | 0.12                           | 0.085        | 0.47                                | <b>0.000</b> |
| <b>Knowledge: watching TV while eating may lead to overweight/obesity</b>                                                  | 0.15                      | 0.086        | 0.08                           | <b>0.011</b> | 0.19                                | <b>0.001</b> |
| <b>Knowledge: children who are overweight or underweight have more health problems than children with a healthy weight</b> | 0.14                      | <b>0.004</b> | 0.00                           | 0.989        | 0.13                                | <b>0.009</b> |
